# Supplementary material for: Comparative genomics and experimental evolution of Escherichia coli BL21(DE3) strains reveal the landscape of toxicity escape from membrane protein overproduction
Source: PubMed Central journal article supplement (PMC4632034; doi:10.1038/srep16076), 2015-11-04

## **Comparative genomics and experimental evolution of *Escherichia coli* BL21(DE3) strains reveal the landscape of toxicity escape from membrane protein overproduction**

Soon-Kyeong Kwon<sup>1,3†</sup>, Seong Keun Kim<sup>2,3†</sup>, Dae-Hee Lee<sup>2,3</sup>, and Jihyun F. Kim<sup>1\*</sup>

<sup>1</sup>Department of Systems Biology and Division of Life Sciences, Yonsei University, 50 Yonsei-ro, Seodaemun-gu, Seoul 120-749, Republic of Korea; <sup>2</sup>Synthetic Biology and Bioengineering Research Center, Korea Research Institute of Bioscience and Biotechnology (KRIBB), 125 Gwahak-ro, Yuseong-gu, Daejeon 305-806, Republic of Korea; <sup>3</sup>Biosystems and Bioengineering Program, University of Science and Technology (UST), 217 Gajung-ro, Yuseong-gu, Daejeon 305-350, Republic of Korea

<sup>†</sup>These authors contributed equally to this work.

\* Correspondence to: Jihyun F. Kim, Department of Systems Biology, College of Life Science and Biotechnology, Yonsei University, 50 Yonsei-ro, Seodaemun-gu, Seoul 120-749, Korea. Tel: +82 2 2123 5561; Fax: +82 2 312 5657; E-mail: jfk1@yonsei.ac.kr.

**Supplementary Table 1.** Bacterial strains and plasmids used in this study.

| Strain or plasmid                        | Derivation, description, and/or phenotype                                                                                                                                | Source or reference         |
|------------------------------------------|--------------------------------------------------------------------------------------------------------------------------------------------------------------------------|-----------------------------|
| <b>Bacterial strains</b>                 |                                                                                                                                                                          |                             |
| <i>Escherichia coli</i>                  |                                                                                                                                                                          |                             |
| BL21(DE3)                                | <i>E. coli</i> B F <sup>-</sup> <i>dcm ompT hsdS(r<sub>B</sub><sup>-</sup> m<sub>B</sub><sup>-</sup>) gal lon</i> λ(DE3 [ <i>lacI lacUV5-T7 gene 1 ind1 sam7 nin5</i> ]) | (Studier and Moffatt, 1986) |
| C41(DE3)                                 | Derived from BL21(DE3) by selecting for resistance to OGCP overexpression                                                                                                | (Miroux and Walker, 1996)   |
| C43(DE3)                                 | Derived from C41(DE3) by selecting for resistance to Ecb overexpression                                                                                                  | (Miroux and Walker, 1996)   |
| BL strains                               | BL21(DE3) derivatives overcoming the toxicity from Ecb transformation                                                                                                    | This study                  |
| BL21(DE3)Δ <i>lacI</i> -P <sub>lac</sub> | Variant of BL21(DE3) where <i>lacI</i> to part of <i>lacZ</i> is deleted                                                                                                 | This study                  |
| C41(DE3)Δ <i>lacI</i> -P <sub>lac</sub>  | Variant of C41(DE3) where <i>lacI</i> to part of <i>lacZ</i> is deleted                                                                                                  | This study                  |
| BR strains                               | BL21(DE3)Δ <i>lacI</i> -P <sub>lac</sub> derivatives overcoming the toxicity from Ecb overexpression                                                                     | This study                  |
| CL strains                               | C41(DE3) derivatives overcoming the toxicity from Ecb overexpression                                                                                                     | This study                  |
| C41(DE3) <i>lacIV</i> 192F               | V192F mutation in the <i>lacI</i> gene at the DE3 region                                                                                                                 | This study                  |
| C43(DE3) <i>lacI</i> F192V               | F192V mutation in the <i>lacI</i> gene at the DE3 region                                                                                                                 | This study                  |
| <b>Plasmids</b>                          |                                                                                                                                                                          |                             |
| pKD46                                    | Plasmid expressing λ-Red, P <sub>araB</sub> , Amp <sup>R</sup>                                                                                                           | (Datsenko and Wanner, 2000) |
| pREDI                                    | P <sub>araB</sub> λ-Red, P <sub>rhaB</sub> I-SceI endonuclease expressing plasmid, Amp <sup>R</sup>                                                                      | (Yu et al., 2008)           |
| pKD3                                     | Template plasmid for gene disruption                                                                                                                                     | (Datsenko and               |

|                     |                                                                                                                                          |                           |
|---------------------|------------------------------------------------------------------------------------------------------------------------------------------|---------------------------|
|                     | with Cm resistance gene flanked by FRT sites, Cm <sup>R</sup> , Amp <sup>R</sup>                                                         | Wanner, 2000)             |
| pKD3/I- <i>SceI</i> | pKD3, I- <i>SceI</i> endonuclease recognition site introduced at both side of the Cm resistance gene, Cm <sup>R</sup> , Amp <sup>R</sup> | This study                |
| pMW7(OGCP)          | T7 promoter, bovine oxoglutarate-malate transport protein (OGCP) cloned pMW7, Amp <sup>R</sup>                                           | (Miroux and Walker, 1996) |
| pMW7(Ecb)           | T7 promoter, <i>E. coli</i> F-ATPase subunit b (Ecb) cloned in pMW7, Amp <sup>R</sup>                                                    | (Miroux and Walker, 1996) |
| pMW7(GFP)           | pMW7 with GFP inserted in the <i>Bam</i> HI/ <i>Hind</i> III site                                                                        | This study                |
| pMW7(Ecb-GFP)       | pMW7 with Ecb fused to GFP at the C-terminus; inserted in the <i>Nde</i> I/ <i>Hind</i> III site                                         | This study                |

---

**Supplementary Table 2.** Primers used for cloning or constructing mutants.

| Name               | Sequence (5' to 3')                                              |
|--------------------|------------------------------------------------------------------|
| T7 promoter primer | TAATACGACTCACTATAGGG                                             |
| Ecb(NSBamHI)-R     | GGGGATCCCAGTTCAGCGACAAGTTTT                                      |
| lacIKO-F           | TCGCATTGGGTCACCAGCAAATCGCGCTGTTAGCGG<br>GCCCGGTCCATATGAATATCCTCC |
| lacIKO-R           | CAACCAGCATCGCAGTGGGAACGATGCCCTCATTCA<br>GCATGGAATACGGTTAGCCATTTG |
| T7lacI-F           | TTGCTCCGGGCTATGAAATA                                             |
| lacI-R             | GTTTTCCCAGTCACGACGTT                                             |
| T7lacIS-F          | CCGGCGTTATTTCTTGATGT                                             |
| T7lacIS-R          | CGGTATCGTCGTATCCCCT                                              |
| qBL21_16S1-F       | CGTGTATGAAGAAGGCCTTCG                                            |
| qBL21_16S1-R       | CTGAGCGTCAGTCTTCGTCC                                             |
| qECB1-F            | CCTGTTCGTTCTGTTCTGCATG                                           |
| qECB1-R            | ACTTGCTTACGCAGCTCTTCAC                                           |

**Supplementary Table 3.** Primers used to confirm the mutations in C41(DE3) or C43(DE3).

| Name            | Sequence (5' to 3')                                   |
|-----------------|-------------------------------------------------------|
| dcu_F/R         | CACAGTGCAGCCAGCCG/<br>TGATTGGCACCTGCATTCTGG           |
| fur_F/R         | GGCTTTCTCGTTCAGGCTGGC/<br>ATGACTGATAACAATACCGCCC      |
| lacI_operon_F/R | ACTGTCCTGGCCGTAACCGA/<br>CAGGGTGGTGAATGTGAAACC        |
| lon_F/R         | CCATTCCCATAACAATTAGTTAACC/<br>CGGATAGATTTTTCCCGCCCG   |
| mel_F/R         | GATCGGTACGTTGGCAAACCTCT/<br>GGAAGTAGAGAATCAGCGTTACCAT |
| rbs_F/R         | TGATATTTTCATCGGTGATCTCCC/<br>CGAATTTCAATGGTATTTCCCTG  |
| lac_DE3_F/R     | GAAAGGTAGGCGGATCCAGATC/<br>CCTCTTCCAGTTAGTAAATCCGGA   |
| ycg_F/R         | GATTCAGCTTCTCTTCAGCCA/<br>GTTTCAATCTGCGTGAGCGC        |
| yeh_F/R         | CGGATCACCGCTTTAATGGTG/<br>GTAATGGGCGGCTTACTCGG        |
| yhh_F/R         | ATGAAACGACTTCTGATTCTTACGG/<br>ATACCGTCAATAAACCCAGCG   |
| yib_F/R         | TAAGCTGAAGCGTTCATAGCGTG/<br>TTTATATCAACCAAACCTTGCGG   |
| yjc_F/R         | GTAGGTCGGATAAAGCGTTTACG/<br>TTTAGCTCCGGCGATTTGAG      |
| ync+cyd_F/R     | CAAACCGAAGCCACATATGCG/<br>GCAAACCTGTAAGCGCGACAG       |
| ccm+omp_F/R     | GTCCAGTGATTCGAGACGAAAC/<br>GCCGCATCCGGCATTTCAG        |
| yji+yjj_F/R     | CGAATTTGCCGACCCGACTA/<br>CGCCGCGTAAGCTCGGG            |

**Supplementary Table 4.** List of genes included in a large deletion across *ccmF* ~ *ompC* in C43(DE3) and their annotated functions.

| Gene        | Function                                                                                                  |
|-------------|-----------------------------------------------------------------------------------------------------------|
| <i>ccmF</i> | heme lyase, CcmF subunit                                                                                  |
| <i>ccmE</i> | periplasmic heme chaperone                                                                                |
| <i>ccmD</i> | cytochrome c biogenesis protein                                                                           |
| <i>ccmC</i> | heme exporter subunit                                                                                     |
| <i>ccmB</i> | heme exporter subunit                                                                                     |
| <i>ccmA</i> | heme exporter subunit                                                                                     |
| <i>napC</i> | nitrate reductase, cytochrome c-type, periplasmic                                                         |
| <i>napB</i> | nitrate reductase, small, cytochrome C550 subunit, periplasmic                                            |
| <i>napH</i> | quinol dehydrogenase membrane component                                                                   |
| <i>napG</i> | quinol dehydrogenase periplasmic component                                                                |
| <i>napA</i> | nitrate reductase, periplasmic, large subunit                                                             |
| <i>napD</i> | assembly protein for periplasmic nitrate reductase                                                        |
| <i>napF</i> | ferredoxin-type protein, predicted role in electron transfer to periplasmic nitrate reductase             |
| <i>eco</i>  | ecotin precursor                                                                                          |
| <i>mgo</i>  | malate:quinone oxidoreductase                                                                             |
| <i>yojI</i> | fused predicted multidrug transport subunits of ABC superfamily: membrane component/ATP-binding component |
| <i>alkB</i> | oxidative demethylase of N1-methyladenine or N3-methylcytosine DNA lesions                                |
| <i>ada</i>  | fused DNA-binding transcriptional dual regulator/O6-methylguanine-DNA methyltransferase                   |
| <i>yojL</i> | predicted thiamine biosynthesis lipoprotein                                                               |
| <i>ompC</i> | outer membrane porin protein C                                                                            |

**Supplementary Table 5.** List of genes included in a large deletion across *yjiV* ~ *yjjN* in C43(DE3) and their annotated functions.

| Gene        | Function                                                                |
|-------------|-------------------------------------------------------------------------|
| <i>yjiV</i> | hypothetical protein                                                    |
| <i>mcrC</i> | 5-methylcytosine-specific restriction enzyme McrBC, subunit McrC        |
| <i>mcrB</i> | 5-methylcytosine-specific restriction enzyme McrBC, subunit McrB        |
| <i>yjiW</i> | hypothetical protein                                                    |
| <i>hsdS</i> | interrupted by <i>IS1</i> ; specificity determinant for hsdM and hsdR   |
| <i>hsdM</i> | DNA methylase M                                                         |
| <i>hsdR</i> | endonuclease R                                                          |
| <i>mrr</i>  | methylated adenine and cytosine restriction protein                     |
| <i>yjiA</i> | predicted GTPase                                                        |
| <i>yjiX</i> | hypothetical protein                                                    |
| <i>yjiY</i> | predicted inner membrane protein                                        |
| <i>hpaC</i> | 4-hydroxyphenylacetate 3-monooxygenase, reductase component             |
| <i>hpaB</i> | 4-hydroxyphenylacetate 3-monooxygenase                                  |
| <i>hpaA</i> | hypothetical protein                                                    |
| <i>hpaX</i> | hypothetical 4-hydroxyphenylacetate permease                            |
| <i>hpaI</i> | 2,4-dihydroxyhept-2-ene-1,7-dioic acid aldolase                         |
| <i>hpaH</i> | 2-oxo-hept-3-ene-1,7-dioate hydratase                                   |
| <i>hpaF</i> | 5-carboxymethyl-2-hydroxymuconate delta-isomerase                       |
| <i>hpaD</i> | Homoprotocatechuate dioxygenase                                         |
| <i>hpaE</i> | 5-carboxy-2-hydroxymuconate semialdehyde dehydrogenase                  |
| <i>hpaG</i> | 4-hydroxyphenylacetate degradation bifunctional isomerase/decarboxylase |
| <i>hpaR</i> | Homoprotocatechuate degradative operon repressor                        |
| <i>tsr</i>  | methyl-accepting chemotaxis protein I, serine sensor receptor           |
| <i>yjiZ</i> | predicted transporter                                                   |
| <i>yjjM</i> | frameshift; putative transcriptional regulator                          |
| <i>yjjN</i> | predicted oxidoreductase, Zn-dependent and NAD(P)-binding               |

**Supplementary Table 6.** List of all nonsynonymous mutations in C43(DE3) and strains obtained from parallel evolution of BL21(DE3) and C41(DE3).

| Strains  | Changes            | Position                          |
|----------|--------------------|-----------------------------------|
| BL3-1    | CTT -> TTT (L791F) | T7 RNAP coding gene <i>l</i>      |
| BL3-2    | TCA -> TA          | T7 RNAP coding gene <i>l</i>      |
| BL3-3    | CAA -> TAA         | T7 RNAP coding gene <i>l</i>      |
| BR-1     | CGC -> TGC (R829C) | T7 RNAP coding gene <i>l</i>      |
| BR-2     | AGC -> AAC (S785N) | T7 RNAP coding gene <i>l</i>      |
| BR-3     | GGT -> GAT (G456D) | T7 RNAP coding gene <i>l</i>      |
| BR-4     | GGT -> GAT (G456D) | T7 RNAP coding gene <i>l</i>      |
| C43(DE3) | GTC-> TTC (V192F)  | <i>lacI</i> in DE3 phage-inserted |
| CL1      | GGT-> AGT (G225S)  | <i>lacI</i> in DE3 phage-inserted |
| CL2      | GCG-> ACG (A75T)   | <i>lacI</i> in <i>lac</i> operon  |
| CL3      | GCG-> ACG (A75T)   | <i>lacI</i> in <i>lac</i> operon  |
| CL3      | CGT-> AGT (R197S)  | <i>lacI</i> in DE3 phage-inserted |



**Supplementary Figure 1.** Transformants of BL21(DE3)  $\Delta lacI-P_{lac}$  and C41(DE3)  $\Delta lacI-P_{lac}$  carrying the pMW7 vector expressing GFP-fused Ecb.

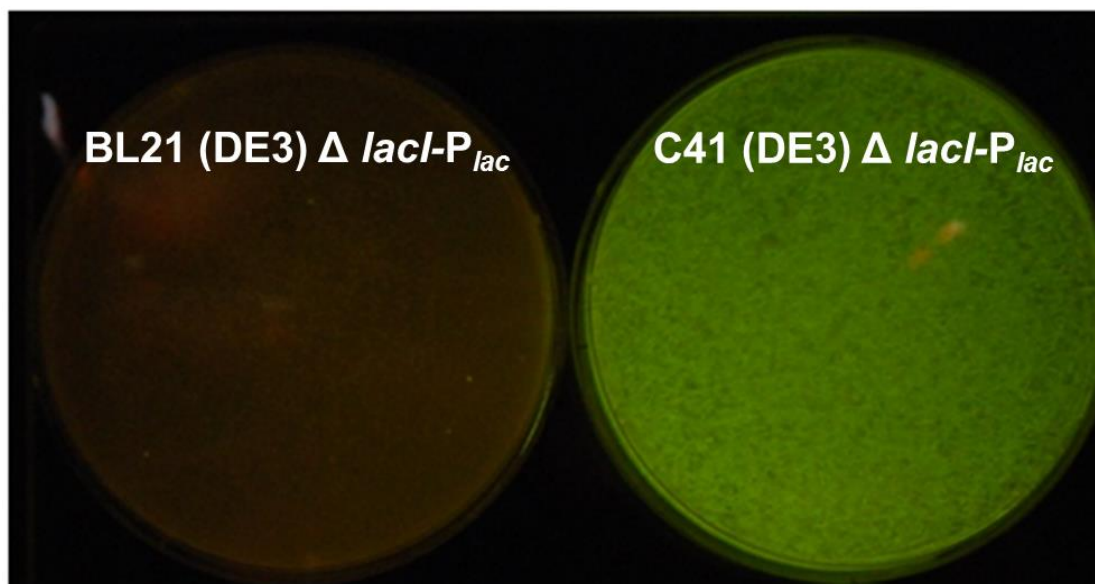

Supplement: srep16076-s1.pdf [file srep16076-s1.pdf]
